# Supplementary material
Source: publisher figshare collection journal article supplement (https://asha.figshare.com/articles/dataset/_/5848059)
Supplement: Supplementary file 2 [file 1]

**Supplemental Material S6.** Hits and correct rejection rates for sentence memory.

| Probe type | Ambiguity   | Acoustic clarity | Age group | <i>M</i> | <i>SD</i> | <i>N</i> |
|------------|-------------|------------------|-----------|----------|-----------|----------|
| Target     | Ambiguous   | +5 dB SNR        | Older     | 0.709    | 0.154     | 30       |
|            |             |                  | Young     | 0.741    | 0.163     | 30       |
|            |             | +15 dB SNR       | Older     | 0.805    | 0.140     | 30       |
|            |             |                  | Young     | 0.769    | 0.157     | 30       |
|            |             | Quiet            | Older     | 0.802    | 0.110     | 30       |
|            |             |                  | Young     | 0.790    | 0.131     | 30       |
|            | Unambiguous | +5 dB SNR        | Older     | 0.813    | 0.120     | 30       |
|            |             |                  | Young     | 0.736    | 0.169     | 30       |
|            |             | +15 dB SNR       | Older     | 0.817    | 0.124     | 30       |
|            |             |                  | Young     | 0.760    | 0.132     | 30       |
|            |             | Quiet            | Older     | 0.825    | 0.119     | 30       |
|            |             |                  | Young     | 0.778    | 0.111     | 30       |
| Foil       | Ambiguous   | +5 dB SNR        | Older     | 0.806    | 0.123     | 30       |
|            |             |                  | Young     | 0.845    | 0.127     | 30       |
|            |             | +15 dB SNR       | Older     | 0.848    | 0.134     | 30       |
|            |             |                  | Young     | 0.838    | 0.119     | 30       |
|            |             | Quiet            | Older     | 0.835    | 0.131     | 30       |
|            |             |                  | Young     | 0.849    | 0.117     | 30       |
|            | unambiguous | +5 dB SNR        | Older     | 0.835    | 0.175     | 30       |
|            |             |                  | Young     | 0.876    | 0.123     | 30       |
|            |             | +15 dB SNR       | Older     | 0.860    | 0.147     | 30       |
|            |             |                  | Young     | 0.834    | 0.161     | 30       |
|            |             | Quiet            | Older     | 0.863    | 0.127     | 30       |
|            |             |                  | Young     | 0.864    | 0.103     | 30       |

**Response times for participants with perfect intelligibility scores**

Z-transformed response data for young and older adults with perfect intelligibility scores are shown in Supplemental Material S4. Degrees of freedom are Greenhouse-Geisser correct to correct for nonsphericity. As with the full data set, we submitted these data to a 2 (ambiguity: high-ambiguity, low-ambiguity)  $\times$  3 (acoustic clarity: quiet, +15 dB, +5 dB)  $\times$  2 (age: young, older) ANOVA. There was a main effect of ambiguity,  $F(1, 39) = 52.55$ , partial  $\eta^2 = 0.57$ ,  $p < .001$ , such that high-ambiguity sentences produced longer responses compared to low-ambiguity sentences. There was no effect of acoustic clarity,  $F(1.88, 73.49) = 1.10$ , partial  $\eta^2 = 0.03$ ,  $p = .34$ , but as in the full dataset the effect of ambiguity differed as a function of acoustic clarity, indicated by a significant Acoustic Clarity  $\times$  Ambiguity Interaction,  $F(1.74, 67.90) = 4.03$ , partial  $\eta^2 = 0.09$ ,  $p = .027$ . There was not a significant effect of age,  $F(1, 39) < 1$ , partial  $\eta^2 = 0.005$ ,  $p = .65$ . However, there was a significant interaction between Age  $\times$  Ambiguity,  $F(1, 39) = 5.45$ , partial  $\eta^2 = 0.12$ ,  $p = .025$ . There was no significant interaction between Age  $\times$  Acoustic Clarity,  $F(1.88, 73.49) = 1.72$ , partial  $\eta^2 = 0.04$ ,  $p = .19$ . The three-way Ambiguity  $\times$  Acoustic Clarity  $\times$  Age interaction was not significant,  $F(1.74, 67.90) < 1$ , partial  $\eta^2 = 0.01$ ,  $p = .63$ .
