# Supplementary material
Source: publisher figshare collection journal article supplement (https://asha.figshare.com/articles/dataset/_/5848059)
Supplement: Supplementary file 3 [file 1]

## **Supplemental Material S5. Rationalized arcsine transformed data.**

### ***Analysis of rationalized arcsine transformed intelligibility data***

To assess the degree to which we were successful at this, we analyzed our intelligibility data using a 3 (acoustic clarity: quiet, +15 dB SNR, +5 dB SNR)  $\times$  2 (age: young, older) ANOVA on rationalized arcsine transformed intelligibility scores. There was a main effect of clarity,  $F(2, 116) = 8.02$ , partial  $\eta^2 = 0.12$ ,  $p < .001$ , indicating that intelligibility was poorer in the more difficult SNR conditions. There was a main effect of age as a result of older adults' overall poorer performance,  $F(1, 58) = 14.67$ ,  $\eta^2 = 0.20$ ,  $p < .001$ . There was also a significant interaction of clarity and age,  $F(2, 116) = 10.28$ ,  $\eta^2 = 0.15$ ,  $p < .001$ , due to older adults' differential difficulty at +5 SNR.

### ***Recognition memory ( $d'$ ) for participants with perfect intelligibility scores***

Recognition memory results for young and older adults with perfect intelligibility scores are shown in Supplemental Material S3. Degrees of freedom are Greenhouse-Geisser correct to correct for nonsphericity. As with the full data set, we submitted these data to a 2 (ambiguity: high-ambiguity, low-ambiguity)  $\times$  3 (acoustic clarity: quiet, +15 dB, +5 dB)  $\times$  2 (age: young, older) ANOVA. There was a main effect of ambiguity,  $F(1, 39) = 16.39$ , partial  $\eta^2 = 0.30$ ,  $p < .001$ , such that high-ambiguity sentences were more poorly recalled than low-ambiguity sentences. There was no effect of acoustic clarity,  $F(1.95, 75.91) = 2.36$ , partial  $\eta^2 = 0.06$ ,  $p = .103$ , but as in the full dataset the effect of ambiguity differed as a function of acoustic clarity, indicated by a significant Acoustic Clarity  $\times$  Ambiguity interaction,  $F(1.98, 77.31) = 7.51$ , partial  $\eta^2 = 0.16$ ,  $p = .001$ . There was not a significant effect of age,  $F(1, 39) = 1.96$ , partial  $\eta^2 = 0.05$ ,  $p = .18$ . However, there was a significant interaction between Age  $\times$  Ambiguity,  $F(1, 39) = 2.43$ , partial  $\eta^2 = 0.27$ ,  $p < .001$ . There was no significant interaction between Age  $\times$  Noise,  $F(1.95, 75.91) = 2.71$ , partial  $\eta^2 = 0.07$ ,  $p = .07$ . The three way Ambiguity  $\times$  Acoustic Clarity  $\times$  Age interaction was significant,  $F(1.98, 77.31) = 3.45$ , partial  $\eta^2 = 0.08$ ,  $p < .05$ .

Follow-up ANOVAs run separately on each age group revealed that the effects of ambiguity, clarity, and the interaction between Ambiguity  $\times$  Acoustic Clarity were selective to only the older adults. For the young adults, ANOVA reveal insignificant effects of ambiguity, acoustic clarity, and the interaction of Ambiguity  $\times$  Acoustic Clarity, all  $F$ s  $< 1.3$ ,  $ns$ . For older adults, effects of ambiguity,  $F(1, 24) = 23.38$ , partial  $\eta^2 = 0.66$ ,  $p < .001$ , acoustic clarity,  $F(2, 24) = 3.84$ , partial  $\eta^2 = 0.24$ ,  $p < .05$ , and the interaction of Ambiguity  $\times$  Acoustic Clarity were all significant,  $F(2, 24) = 7.91$ , partial  $\eta^2 = 0.40$ ,  $p = .002$ . As shown in Supplemental Material S3, interaction of Ambiguity  $\times$  Acoustic Clarity revealed little change in older adults'  $d'$  as a function of acoustic clarity when the target sentences were nonambiguous, and a large increase in older adults'  $d'$  as a function of acoustic clarity when target sentences were ambiguous.
