# Supplementary material
Source: publisher figshare collection journal article supplement (https://asha.figshare.com/articles/dataset/_/5848059)
Supplement: Supplementary file 4 [file 1]

**Supplemental Material S4.** Correlations between hearing and memory performance for the most difficult sentence condition (high-ambiguity sentences at +5 dB SNR), on the subset of participants who had 100% intelligibility accuracy on all conditions (compare to Figure 2 in the main article).

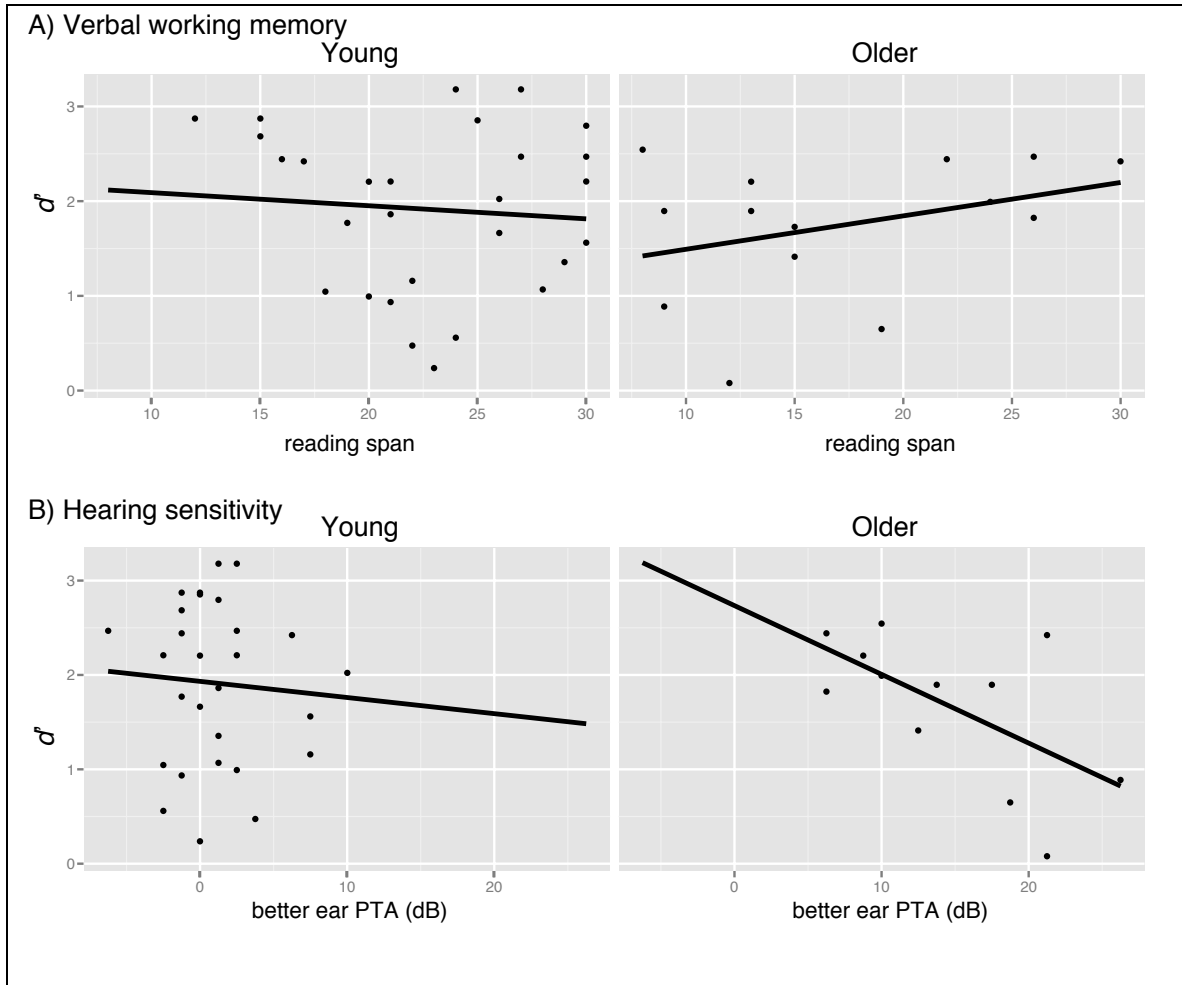

Figure also available via a CC-BY4.0 license from <https://osf.io/53tmq/>
