# Supplementary material
Source: publisher figshare collection journal article supplement (https://asha.figshare.com/articles/dataset/_/5848059)
Supplement: Supplementary file 5 [file 1]

**Supplemental Material S3.** Results for recognition memory task for the subset of participants who had 100% intelligibility on all conditions (compare to Figure 1 in the main article). Error bars show 95% confidence intervals. (A) Recognition accuracy ( $d'$ ) for young and older adults. (B) Z-transformed response times to recognition memory judgments for young and older adults.

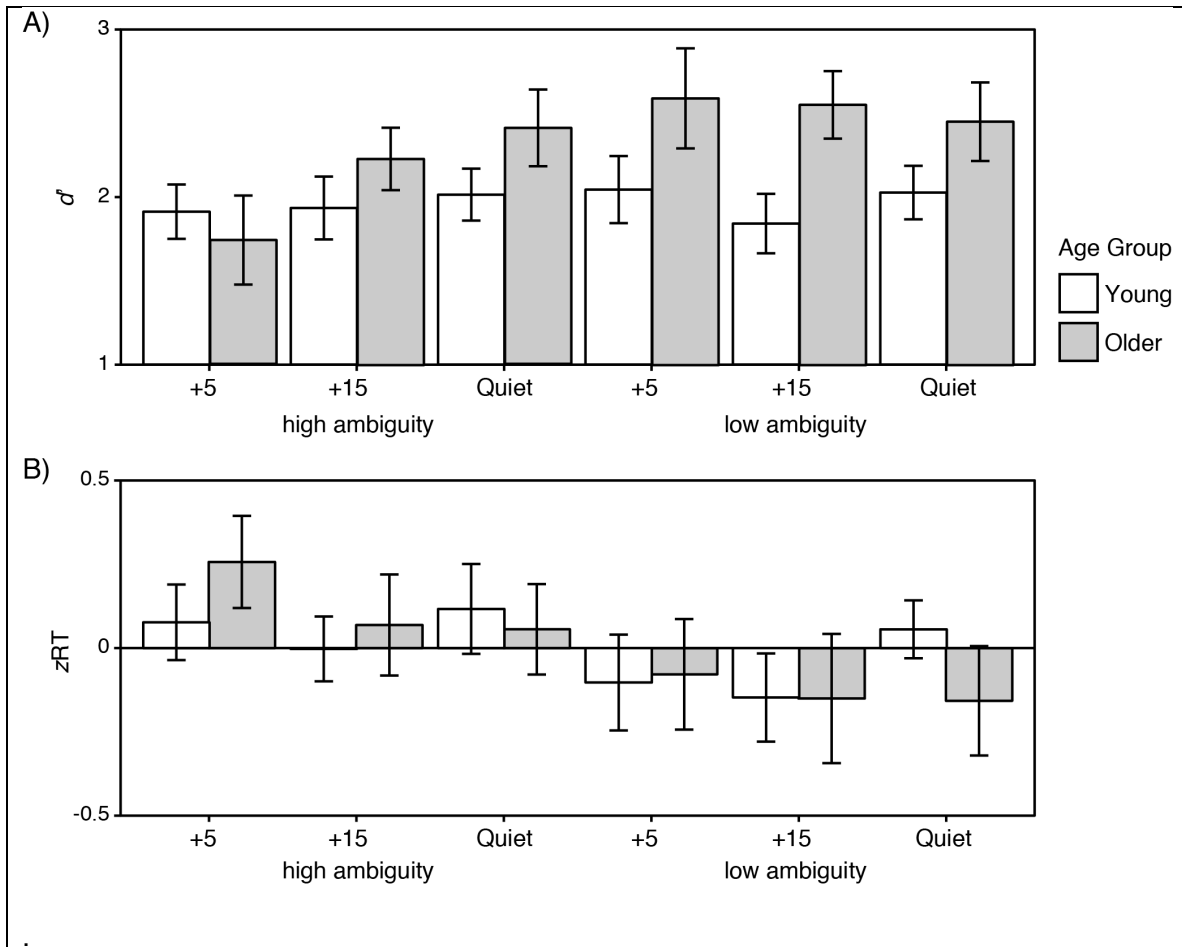

Figure also available via a CC-BY4.0 license from <https://osf.io/53tmq/>
