# Supplementary material
Source: publisher figshare collection journal article supplement (https://asha.figshare.com/articles/dataset/_/5848059)
Supplement: Supplementary file 6 [file 1]

**Supplemental Material S2.** Summary of intelligibility scores for young and older adults across all acoustic conditions.

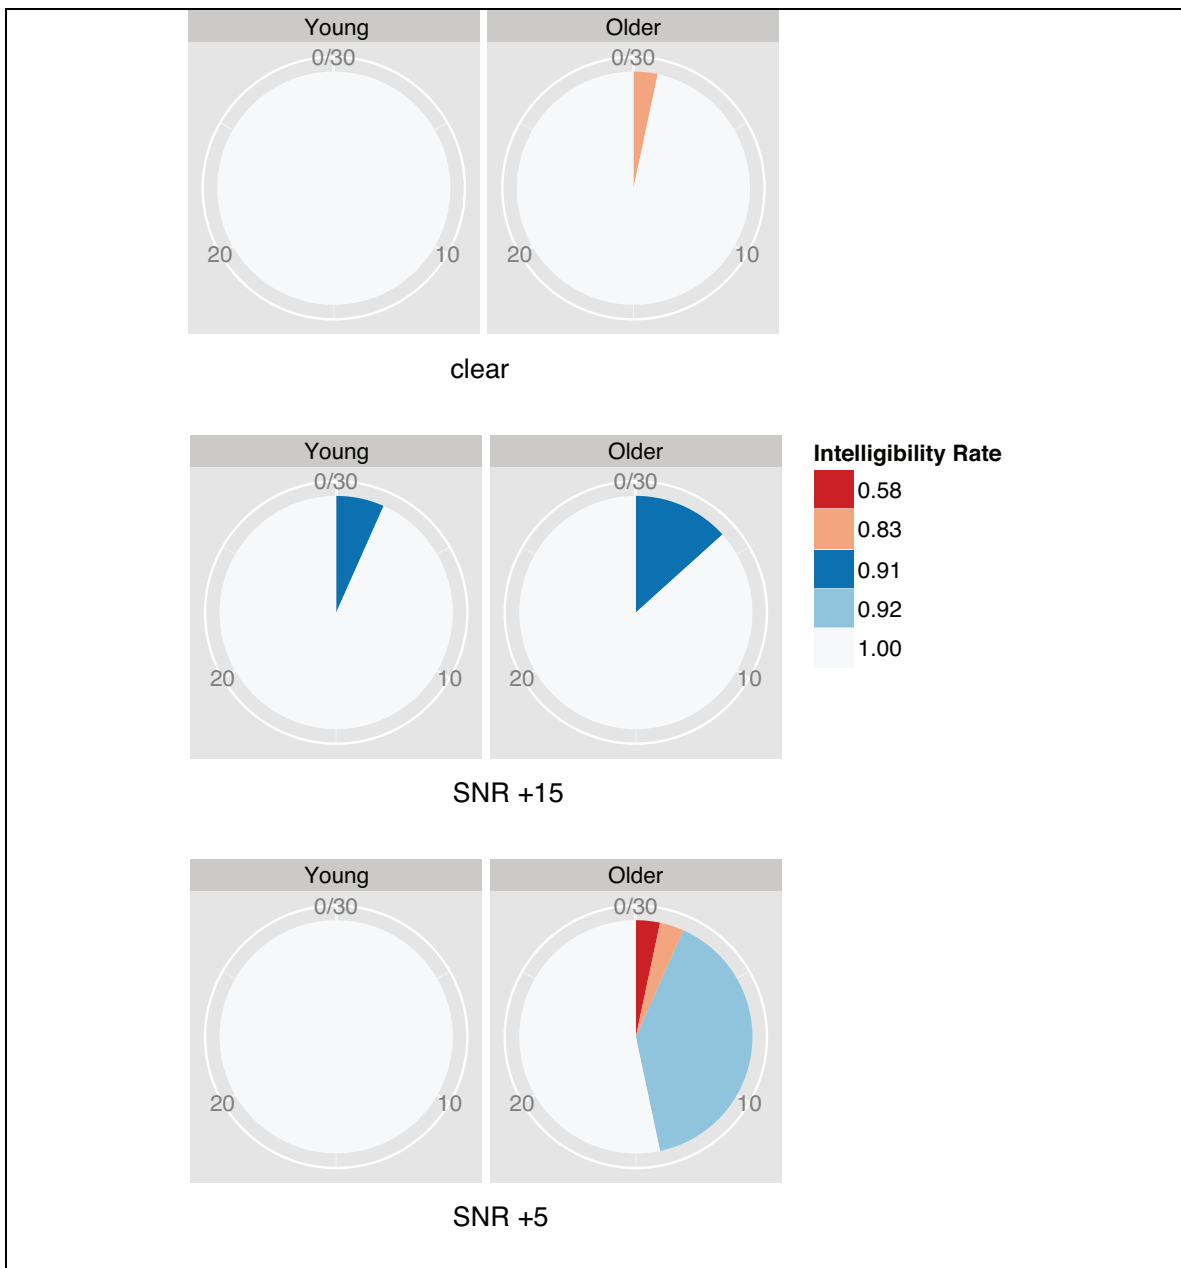

Figure also available via a CC-BY4.0 license from <https://osf.io/53tmq/>
